# Supplementary material for: Mixtures of Lipophilic Phycotoxins: Exposure Data and Toxicological Assessment
Source: Mar Drugs. 2018 Jan 31;16(2):46. doi: 10.3390/md16020046 (PMC5852474; doi:10.3390/md16020046)
Supplement: Supplementary file 1 [file marinedrugs-16-00046-s001.xlsx]

## Sheet: Ajani et al. 2017
	Recent Trends in Marine Phycotoxins from Australian
	CoastalWaters
	Penelope Ajani, D. Tim Harwood and Shauna A. Murray
	Sample	PTX-2	PTX-2 sa	PTX-2 eq	OA	OA after hydrolysis	OA eq	ratio PTX-2 eq / OA eq
	Whole scallop	0.023	0.51	0.533	0.018	< LOD	0.018	29.6111
	Processed scallop	< LOD	0.037	0.037	0.014	< LOD	0.014	2.64286
	Whole razorfish	0.013	0.15	0.163	0.051	0.089	0.14	1.16429
	Processed razorfish	< LOD	0.023	0.023	< LOD	< LOD
	Whole oyster	0.11	0.79	0.9	0.023	0.12	0.143	6.29371

## Sheet: Amzil et al. 2007
	Report on the First Detection of Pectenotoxin-2,
	Spirolide-A and Their Derivatives in French Shellfish
	Zouher Amzil, Manoella Sibat, Florence Royer, Nadine Masson and Eric Abadie
	south brittany	total OAs = OA eq	total PTX-2 = PTX-2 eq	total SPXs = SPX-1 eq	ratio OA eq/PTX-2 eq	ratio OA eq/SPX-1 eq	ratio SPX-1 eq/PTX-2 eq	ratio PTX-2 eq/OA eq	ratio PTX-2 eq/SPX-1 eq
	clams	634	40	10	15.85	63.4
	mussels	317		23		13.7826
	at coast
	oysters	180	11	47	16.3636	3.82979	4.27273
	mussels	791	391	87	2.02302	9.09195			4.49425
	medit coast
	oysters	46	225					4.8913
	mussels	214	268					1.25234

## Sheet: Campbell et al. 2014
	Evolving to the optoelectronic mouse for phycotoxin
	analysis in shellfish
	Katrina Campbell & Sara E. McNamee & Anne-Catherine Huet & Philippe Delahaut &
	Natalia Vilarino & Luis M. Botana & Mark Poli & Christopher T. Elliott
	Shellfish samples (n=48) consisting of mussels (Mytilus
	edulis), cockles (Cerastoderma edule), oysters (Crassostrea
	Gigas) and scallops (Pecten maximus) were collected from
	different European locations
	Sample number	Sample species	PSP toxins	OA + DTXs = OA eq	DA	ratio PSP/OA eq	ratio PSP/DA	ratio OA eq/PSP	ratioOA eq/DA
	S1	Mussel	1100	19	5.6	57.8947	196.429
	S2	Mussel	431	82	0	5.2561
	S3	Mussel	1200	29	1.4	41.3793	857.143
	S4	Mussel	1274	71	0	17.9437
	S5	Mussel	87	144	3.5			1.65517	41.1429
	S6	Mussel	310	36	1.7	8.61111	182.353
	S7	Mussel	13	43	1.1			3.30769	39.0909
	S8	Mussel	16	170	2.7			10.625	62.963
	S9	Mussel	14	47	3.1			3.35714	15.1613
	S10	Mussel	66	187	2.9			2.83333	64.4828
	S11	Mussel	12	239	0			19.9167
	S12	Mussel	4	195	1.5			48.75	130
	S13	Scallop	33	71	sup 100
	S14	Mussel	36	56	0.9			1.55556	62.2222
	S15	Oysters	60	1	2.9	60	20.6897
	S16	Mussel	72	153	0			2.125
	S17	Scallop	102	6	sup 100
	S18	Scallop	191	306	sup 100
	S19	Scallop	166	1	sup 100
	S20	Scallop	297	357	sup 100
	S21	Mussel	1758	1	3.8	1758	462.632
	S22	Mussel	2620	52	3.2	50.3846	818.75
	S23	Mussel	2118	2	1.3	1059	1629.23
	S24	Mussel	210	214	3.9			1.01905	54.8718
	S25	Mussel	4	1	1.3	4	3.07692
	S26	Mussel	4	1	1.1	4	3.63636
	S27	Cockles	4	1	3.4	4	1.17647
	S28	Mussel	322	1	0.4	322	805
	S29	Scallop	4	43	6.2			10.75	6.93548
	S30	Scallop	2	1	1.2	2	1.66667
	S31	Scallop	60	46	6.8	1.30435	8.82353
	S32	Scallop	68	45	8.7	1.51111	7.81609
	S33	Scallop	100	50	43	2	2.32558
	S34	Scallop	94	60	52	1.56667	1.80769
	S35	Mussel	49	200	0			4.08163
	S36	Scallop	93	147	46			1.58065	3.19565
	S37	Mussel	147	9	2.1	16.3333	70
	S38	Mussel	171	5	1.2	34.2	142.5
	S39	Mussel	4	1	0.3	4	13.3333
	S40	Scallop	13	19	50			1.46154	0.38
	S41	Mussel	19	17	0.3	1.11765	63.3333
	S42	Mussel	264	1	0.6	264	440
	S43	Mussel	265	1	0.3	265	883.333
	S44	Cockles	2758	8	0.6	344.75	4596.67
	S45	Cockles	3993	24	0.7	166.375	5704.29
	S46	Cockles	4252	12	0.9	354.333	4724.44
	S47	Cockles	3993	31	0.8	128.806	4991.25
	S48	Cockles	2111	28	1	75.3929	2111

## Sheet: Ciminiello et al. 1997
	YESSOTOXIN IN MUSSELS OF THE NORTHERN
	ADRIATIC SEA
	PATRIZIA CIMINIELLO,ERNEST0 FATTORUSSO,
	MARTIN0 FORINO, SILVANA MAGNO, ROBERTO POLETTI.
	MASAYUKI SATAKE, ROMAN0 VIVIANI
	and TAKESHI YASUMOT0
	OA	1.1	µg/g		ratio YTX/OA
	YTX	1.8	µg/g		1.63636

## Sheet: Ciminiello et al. 2010
	Complex toxin profile of Mytilus galloprovincialis from
	the Adriatic sea revealed by LC–MS
	Patrizia Ciminiello, Carmela Dell’Aversano, Ernesto Fattorusso,
	Martino Forino, Luciana Tartaglione, Lari Boschetti, Silva Rubini,
	Monica Cangini, Silvia Pigozzi, Roberto Poletti
	Date	Station	Sample	Fraction	SPX-1	13,19-didesMe SPX C	SPX-1 eq	PTX-2 sa = PTX-2 eq	ratio SPX-1 eq / PTX-2 eq
	2003-11-25	B4	mussel	CH2Cl2	0.66	3.83	4.49	0.011	408.182

## Sheet: Čustović et al. 2014
	THE PREDOMINANT OCCURRENCE OF YTX IN THE
	EASTERN-MID ADRIATIC SEA (VRANJIC BASIN, CROATIA)								Samples of the shellfish Mytilus galloprovincialis
									were collected from the Vranjic Basin
	Selma Čustović, Stjepan Orhanović, Sanda Skejić and Maja Pavela-Vrančič
	Date of sampling	ester. OA	YTX	ratio YTX / OA eq
	May 2004	41.31	219	5.30138
	April 2005	28.77	207	7.19499

## Sheet: Draisci et al. 1999
	High levels of yessotoxin in mussels and
	presence of yessotoxin and homoyessotoxin in
	dinofagellates of the Adriatic Sea
	R. Draisci, E. Ferretti, L. Palleschi, C. Marchiafava,
	R. Poletti, A. Milandri, A. Ceredi, M. Pompeib
			OA	YTX	ratio OA / YTX	ratio YTX / OA
	ravenna	1997-06-25	0.13	0.18		1.38462
	cesenatico	1997-07-01	1.75	0.4	4.375
	cesenatico	1997-07-15	2.31	0.24	9.625
	cesenatico	1997-08-13	1.44	9.02		6.26389
	cesenatico	1997-10-06	0.5	3.51		7.02
	ravenna	1997-10-15	0.19	0.22		1.15789
	cesenatico	1997-10-20	1.03	1.14		1.1068

## Sheet: Fang et al. 2014
	Solid-Phase Extraction-Based Ultra-Sensitive Detection of Four Lipophilic Marine Biotoxins
	in Bivalves by High-Performance Liquid Chromatography–Tandem Mass Spectrometry
	Lanyun Fang, Xunping Yao, Li Wang and Jige Li
	PTX2 and SPX1 were found at the levels of 0.40 and
	0.56 µg /kg, respectively, in one oyster.
	PTX-2	SPX-1	ratio SPX-1/PTX-2
	0.4	0.56	1.4

## Sheet: Fernandez Puente et al. 2004
	Rapid determination of polyether marine toxins using liquid
	chromatography–multiple tandem mass spectrometry
	Patricia Fernandez Puente, Maria Jose Fidalgo Saez, Brett Hamilton, Mary Lehane,
	Hanne Ramstad, Ambrose Furey, Kevin J. James
			Samples	OA	DTX-2	DTX-1	OA eq	PTX2 sa	7epiPTX2sa	PTX2	PTX-2 eq		ratio OA eq/PTX-2 eq
			Ireland mussels	1.5	3.7		5.2	0.29	0.064	0.068	0.422		12.3223
			Norway mussels	1		18	19	0.39	1.5	0.14	2.03		9.35961

## Sheet: Fux et al. 2009
	Comparative accumulation and composition of lipophilic marine biotoxins in
	passive samplers and in mussels (M. edulis) on the West Coast of Ireland
	Elie Fux, Ronel Bire, Philipp Hess
	Table 3
	Date	Sampler	OA	OA esters	DTX2	DTX2 esters	OA eq	PTX-2	AZA1	AZA2	AZA3	AZA eq	YTX		ratio AZA eq / OA eq	ratio OA eq / AZA eq	ratio OA eq /YTX
	15-August	Indigenous	300	368	84		752		857	466	53	1376			1.82979
	22-August	Indigenous	482	463		163	1108		2659	1317	357	4333			3.91065
	29-August	Indigenous	712	597	231	35	1575		4595	2025	768	7388			4.69079
	31-August	Transplanted		11			11		171	24	403	598			54.3636
	31-August	Transplanted		7			7		186	22	360	568			81.1429
	5-September	Indigenous	422	348	160		930		4897	2046	472	7415			7.97312
	8-September	Transplanted	104	25			129		164	17	160	341			2.64341
	8-September	Transplanted		33			33		82	14	188	284			8.60606
	8-September	Transplanted	226	243			469		170	23	294	487			1.03838
	12-September	Indigenous	1191		122		1313			3151		3151			2.39985
	15-September	Transplanted	414	319			733		247	18	107	372	73			1.97043	10.0411
	15-September	Transplanted	234	228			462		168	13	159	340	16			1.35882	28.875
	15-September	Transplanted	237	259			496		120	9	111	240				2.06667
	20-September	Indigenous	582	504	60	36	1182		4032	1882	254	6168			5.21827
	22-September	Transplanted		18			18		51		45	96			5.33333
	22-September	Transplanted	22	52			74		49		64	113			1.52703
	26-September	Indigenous	520	253		31	804		2546	1055	124	3725			4.63308
	7-October	Transplanted		25			25		116	3	84	203			8.12
	10-October	Indigenous	252		66		318		1232	542	85	1859			5.84591
	17-October	Indigenous	183				183		3037	1370	111	4518			24.6885
	24-October	Indigenous	253				253		1340	601	48	1989			7.86166
	Table 5
	Date	Sampler	OA	OA esters	DTX2	DTX2 esters	OA eq		AZA1	AZA2	AZA3	AZA eq			ratio AZA eq / OA eq	ratio OA eq / AZA eq
	5-September	Indigenous		77	267	338	682		16			16				42.625
	7-September	Transplanted	24				24		71	28	44	143			5.95833
	26-September	Indigenous			136		136		38	26		64				2.125
	3-October	Indigenous				70	70		312	148	11	471			6.72857
	10-October	Indigenous			72		72		626	291	49	966			13.4167
	17-October	Indigenous				97	97		629	272	72	973			10.0309
	25-October	Indigenous			73	96	169		363	204	18	585			3.46154

[truncated: 34 more sheets: Garcia et al. 2012, García et al. 2016, Gerssen et al. 2010, Gerssen et al. 2011, Guo et al. 2012, Hashimoto et al. 2006, Hattenrath-Lehmann et al. 2013, Jiang et al. 2017, Lee et al. 2012, Li et al. 2012, Li et al. 2014, Li et al. 2016, Liu et al. 2011, MacKenzie et al. 2002, Madigan et al. 2006, McNabb et al. 2005, Nincevic-Gladan et al. 2008, Ninčević Gladan et al. 2010, Nincevic Gladan et al. 2011, Pavela-Vrancic et al. 2002 …]
